# Supplementary figures and images for: Risk and resilience for alcohol use disorder revealed in brain functional connectivity
Source: PubMed Central journal article supplement — Neuroimage Clin. 2021 Aug 24;32:102801. doi: 10.1016/j.nicl.2021.102801 (PMC8416942; doi:10.1016/j.nicl.2021.102801), 2021-08-24

## Risk Functional Connections

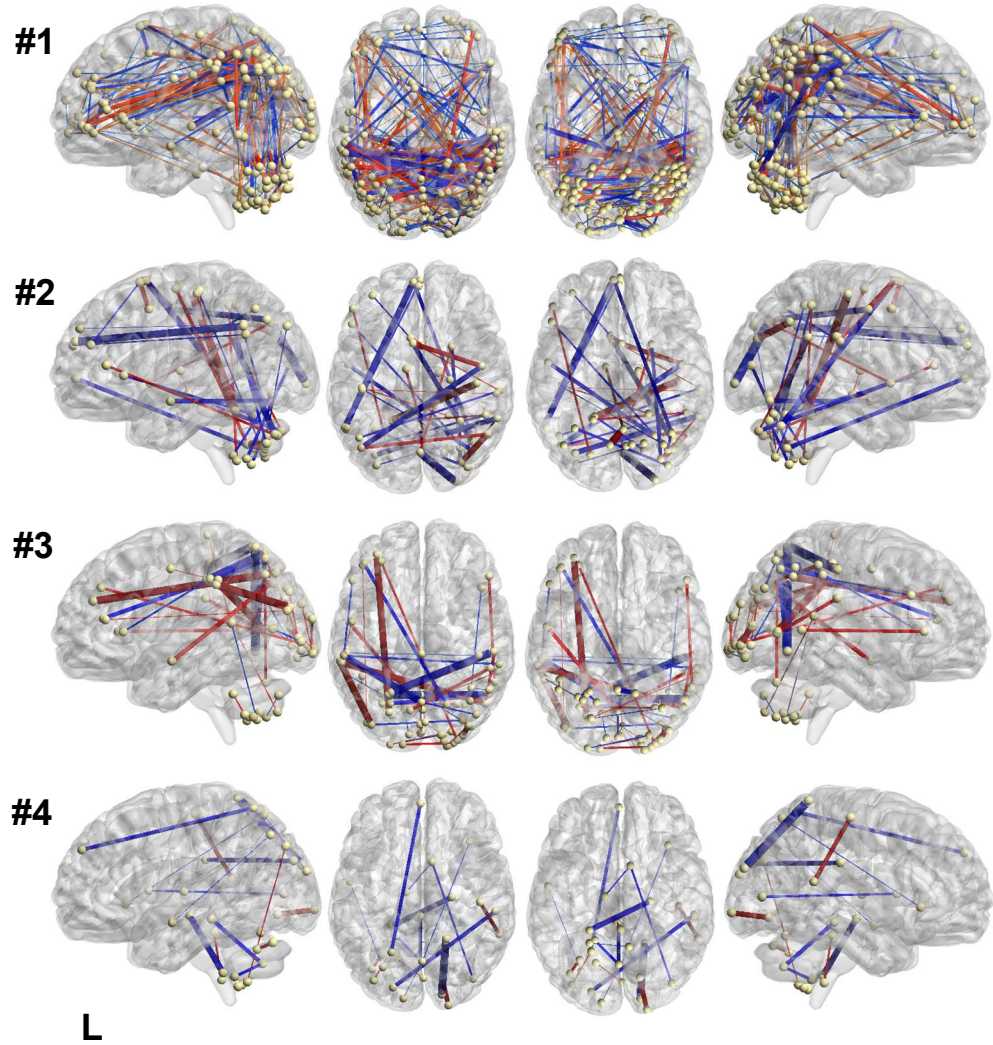

## Resilience Functional Connections

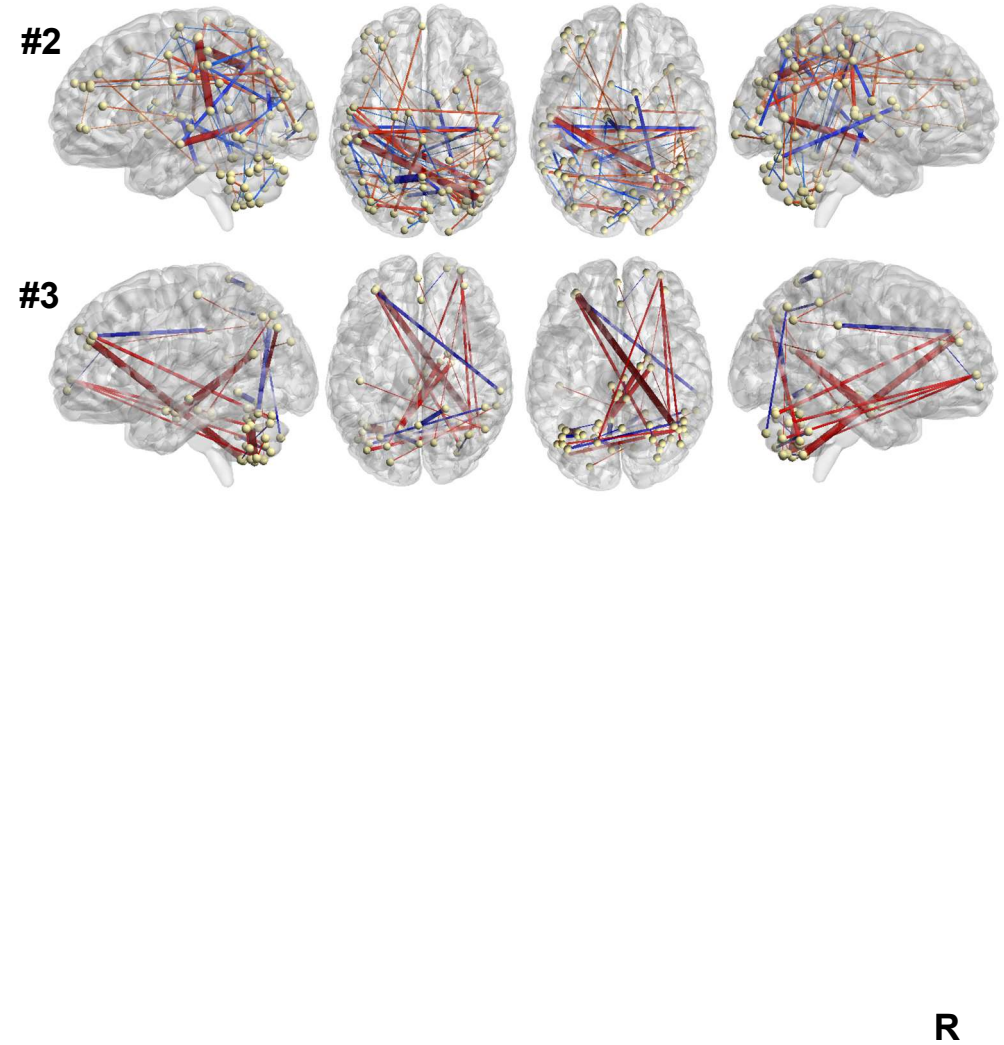

L

R

Supplement: mmc2.pdf [file mmc2.pdf]

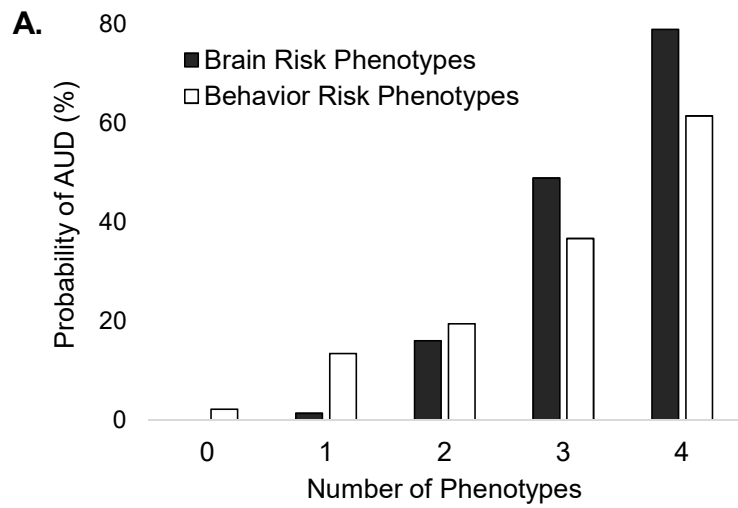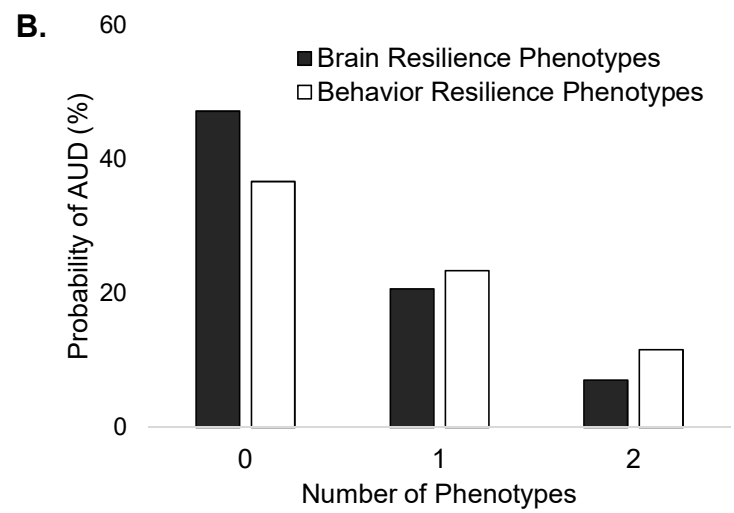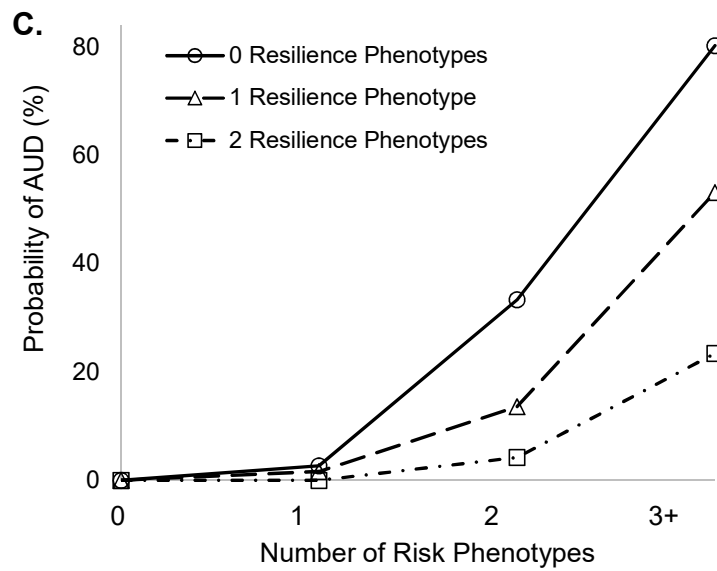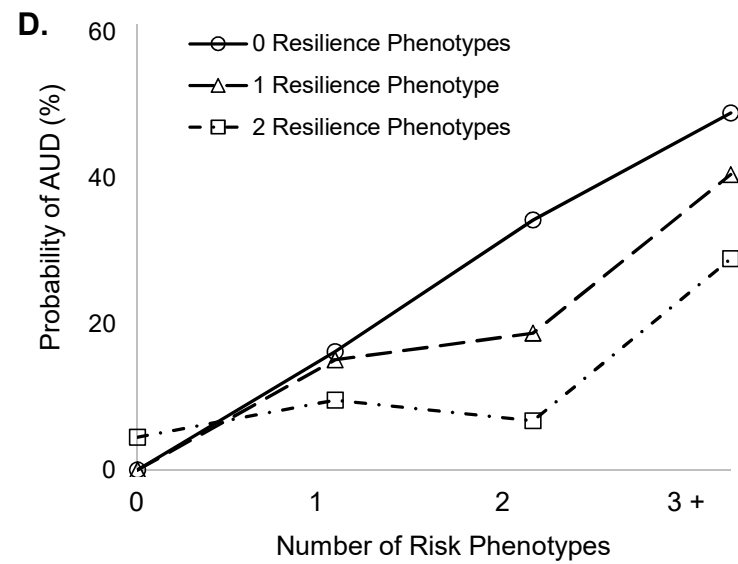

Supplement: mmc3.pdf [file mmc3.pdf]
